# Supplementary material for: Improved surface-enhanced Raman scattering on micro-scale Au hollow spheres: Synthesis and application in detecting tetracycline
Source: Royal Society of Chemistry journal article supplement (doi:10.1039/c1an15195a), 2011-01-01
Supplement: c1an15195a.pdf [file c1an15195a.pdf]

**Figure captions:**

**Figure S1.** SERS spectrum of solid R6G.

**Figure S2.** SERS spectrum of solid TC.

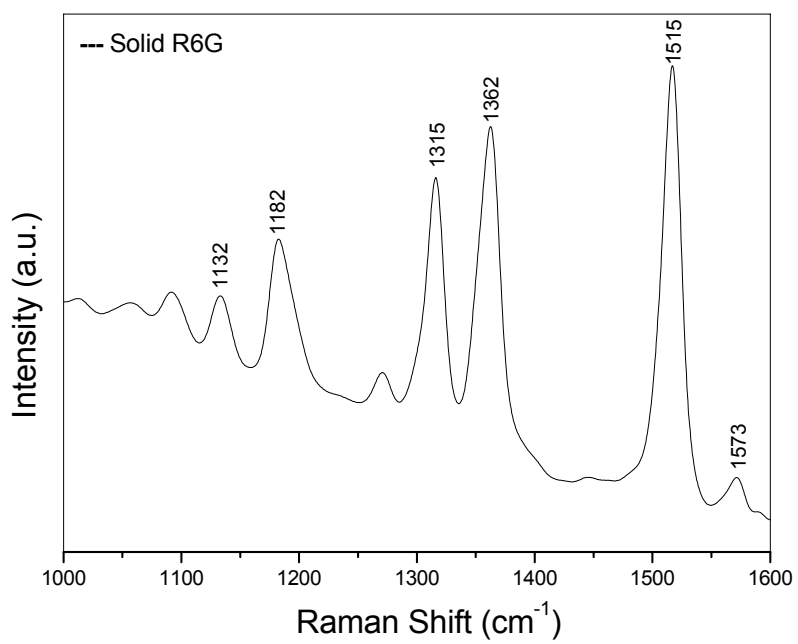

**Figure S1**

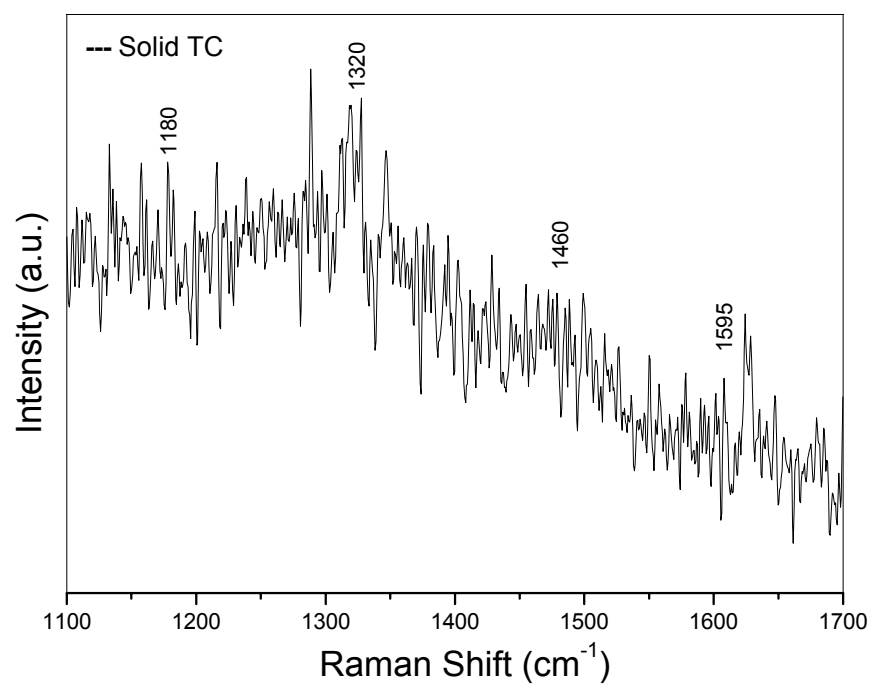

**Figure S2**
